# Supplementary material
Source: MDPI journal article supplement (https://www.mdpi.com/2311-553X/9/1/9)
Supplement: s1 [file s1]

**Table S1:** Tissue miRNAs associated with diagnostic features in LSCC.

| Tissue miRNA         | Dysplasia | LSCC | Grading | T stage | N Stage | Number of Paper(s)* | Cohort numerosity (range)# | Refs                                     |
|----------------------|-----------|------|---------|---------|---------|---------------------|----------------------------|------------------------------------------|
| <b>Downregulated</b> |           |      |         |         |         |                     |                            |                                          |
| let-7a-5p            | 0         | 3↓   | 2↓      | 1↓      | 1↓      | 3                   | 150 (43-59)                | [110, 122, 181]                          |
| let-7c-5p            | 0         | 1↓   | 0       | 0       | 0       | 1                   | 57                         | [34]                                     |
| let-7f-5p            | 0         | 1↓   | 0       | 0       | 0       | 1                   | 32                         | [146]                                    |
| miR-101-3p           | 0         | 1↓   | 0       | 1↓      | 1↓      | 1                   | 80                         | [156]                                    |
| miR-107              | 0         | 2↓   | 1↓      | 0       | 1↓      | 2                   | 70 (30-40)                 | [22, 72]                                 |
| miR-10a-5p           | 0         | 1↓   | 0       | 0       | 0       | 1                   | 32                         | [146]                                    |
| miR-1205             | 0         | 1↓   | 0       | 1↓      | 1↓      | 1                   | 44                         | [70]                                     |
| miR-1225-5p          | 0         | 1↓   | 0       | 0       | 0       | 1                   | 20                         | [96]                                     |
| miR-124-3p           | 0         | 1↓   | 0       | 1↓      | 0       | 1                   | 34                         | [85]                                     |
| miR-125a-5p          | 0         | 1↓   | 0       | 0       | 0       | 1                   | 30                         | [180]                                    |
| miR-125b-2           | 0         | 1↓   | 0       | 0       | 0       | 1                   | 10                         | [140]                                    |
| miR-125b-5p          | 0         | 6↓   | 1↓      | 2↓      | 1↓      | 6                   | 292(12-87)                 | [32, 43, 82, 101, 117, 130]              |
| miR-1287-5p          | 0         | 1↓   | 0       | 0       | 0       | 1                   | 49                         | [137]                                    |
| miR-128a-3p          | 0         | 1↓   | 0       | 0       | 0       | 1                   | 10                         | [140]                                    |
| miR-1299             | 0         | 1↓   | 0       | 0       | 0       | 1                   | 10                         | [140]                                    |
| miR-133a-3p          | 0         | 2↓   | 0       | 0       | 0       | 2                   | 138 (62-76)                | [28, 184]                                |
| miR-133b             | 0         | 3↓   | 0       | 0       | 0       | 3                   | 210 (50-84)                | [28, 46, 131]                            |
| miR-134-5p           | 0         | 0    | 0       | 1↓      | 0       | 1                   | 42                         | [41]                                     |
| miR-136-5p           | 0         | 2↓   | 0       | 0       | 0       | 2                   | 50 (10-40)                 | [64, 140]                                |
| miR-139-5p           | 0         | 2↓   | 0       | 1↓      | 0       | 2                   | 156 (76-80)                | [28, 134]                                |
| miR-1-3p             | 0         | 1↓   | 0       | 0       | 0       | 1                   | 76                         | [28]                                     |
| miR-140-3p           | 0         | 1↓   | 0       | 0       | 0       | 1                   | 76                         | [28]                                     |
| miR-140-5p           | 0         | 3↓   | 0       | 0       | 0       | 3                   | 146 (40-56)                | [68, 83, 192]                            |
| miR-141-3p           | 0         | 1↓   | 1↓      | 1↓      | 1↓      | 1                   | 60                         | [73]                                     |
| miR-143-3p           | 0         | 2↓   | 2↓      | 2↓      | 1↓      | 2                   | 112 (52-60)                | [90, 93]                                 |
| miR-144-3p           | 0         | 3↓   | 0       | 0       | 0       | 3                   | 116 (24-60)                | [42, 146, 173]                           |
| miR-145-5p           | 0         | 9↓   | 2↓      | 3↓      | 2↓      | 9                   | 662 (12-188)               | [32, 42, 59, 92, 99, 130, 131, 153, 167] |
| miR-147a             | 0         | 1↓   | 0       | 0       | 0       | 1                   | 45                         | [24]                                     |
| miR-148a-5p          | 0         | 1↓   | 0       | 0       | 0       | 1                   | 12                         | [32]                                     |
| miR-149-5p           | 0         | 2↓   | 1↓      | 1↓      | 1↓      | 2                   | 176 (33-143)               | [43, 179]                                |

|             |   |    |    |    |    |   |              |                                    |
|-------------|---|----|----|----|----|---|--------------|------------------------------------|
| miR-152-3p  | 0 | 1↓ | 0  | 1↓ | 1↓ | 1 | 83           | [144]                              |
| miR-153-3p  | 0 | 1↓ | 0  | 0  | 0  | 1 | 38           | [170]                              |
| miR-154-5p  | 0 | 1↓ | 1↓ | 1↓ | 0  | 1 | 104          | [100]                              |
| miR-16-5p   | 0 | 1↓ | 0  | 0  | 0  | 1 | 10           | [129]                              |
| miR-1911-3p | 0 | 1↓ | 0  | 0  | 0  | 1 | 78           | [29]                               |
| miR-193a-3p | 0 | 1↓ | 0  | 0  | 0  | 1 | 10           | [129]                              |
| miR-194-5p  | 0 | 1↓ | 0  | 0  | 0  | 1 | 20           | [81]                               |
| miR-195-5p  | 0 | 7↓ | 1↓ | 4↓ | 2↓ | 7 | 580 (23-182) | [75, 107, 111, 114, 115, 146, 197] |
| miR-199b-5p | 0 | 1↓ | 0  | 0  | 0  | 1 | 87           | [82]                               |
| miR-203a-3p | 0 | 2↓ | 0  | 1↓ | 1↓ | 2 | 92 (32-60)   | [146, 175]                         |
| miR-204-5p  | 0 | 5↓ | 0  | 2↓ | 1↓ | 5 | 243 (12-87)  | [32, 49, 65, 82, 113]              |
| miR-206     | 0 | 4↓ | 1↓ | 1↓ | 1↓ | 4 | 128 (10-68)  | [126, 140, 158, 193]               |
| miR-210-5p  | 0 | 1↓ | 0  | 0  | 0  | 1 | 45           | [27]                               |
| miR-218-5p  | 0 | 2↓ | 0  | 0  | 0  | 2 | 53 (10-43)   | [118, 140]                         |
| miR-22-3p   | 0 | 2↓ | 0  | 1↓ | 0  | 2 | 10           | [76] [129]                         |
| miR-299-5p  | 0 | 1↓ | 0  | 0  | 0  | 1 | 10           | [140]                              |
| miR-29c-3p  | 0 | 2↓ | 1↓ | 1↓ | 1↓ | 2 | 153 (66-87)  | [74, 82]                           |
| miR-302b-3p | 0 | 2↓ | 0  | 0  | 0  | 2 | 171 (85-86)  | [52, 86]                           |
| miR-30a-5p  | 0 | 1↓ | 0  | 0  | 0  | 1 | 10           | [140]                              |
| miR-330-3p  | 0 | 2↓ | 0  | 0  | 0  | 2 | 87 (32-55)   | [56, 58]                           |
| miR-337-3p  | 0 | 1↓ | 0  | 0  | 0  | 1 | 10           | [140]                              |
| miR-340-3p  | 0 | 1↓ | 0  | 0  | 0  | 1 | 30           | [38]                               |
| miR-340-5p  | 0 | 2↓ | 0  | 0  | 0  | 2 | 65 (15-50)   | [54, 162]                          |
| miR-34b-3p  | 0 | 1↓ | 0  | 0  | 0  | 1 | 10           | [140]                              |
| miR-34c-3p  | 0 | 1↓ | 0  | 0  | 0  | 1 | 10           | [140]                              |
| miR-363-3p  | 0 | 1↓ | 0  | 0  | 0  | 1 | 48           | [98]                               |
| miR-365a-3p | 0 | 1↓ | 0  | 0  | 0  | 1 | 58           | [44]                               |
| miR-370-3p  | 0 | 2↓ | 0  | 0  | 0  | 2 | 58 (18-40)   | [139, 195]                         |
| miR-372-3p  | 0 | 1↓ | 0  | 0  | 1↓ | 1 | 76           | [28]                               |
| miR-375-5p  | 0 | 1↓ | 0  | 0  | 0  | 1 | 46           | [147]                              |
| miR-381-3p  | 0 | 1↓ | 0  | 0  | 0  | 1 | 52           | [71]                               |
| miR-384     | 0 | 1↓ | 0  | 0  | 0  | 1 | 12           | [89]                               |
| miR-410-3p  | 0 | 1↓ | 0  | 0  | 0  | 1 | 10           | [140]                              |
| miR-432-5p  | 0 | 1↓ | 0  | 0  | 0  | 1 | 10           | [140]                              |
| miR-4497    | 0 | 1↓ | 0  | 0  | 0  | 1 | 30           | [102]                              |

|                    |   |    |    |    |    |   |             |                |
|--------------------|---|----|----|----|----|---|-------------|----------------|
| miR-449a           | 0 | 2↓ | 0  | 0  | 1↓ | 2 | 20 (10-10)  | [28, 129]      |
| miR-449b-5p        | 0 | 1↓ | 0  | 0  | 0  | 1 | 76          | [28]           |
| miR-4640-5p        | 0 | 1↓ | 0  | 0  | 0  | 1 | 30          | [94]           |
| miR-4687-3p        | 0 | 1↓ | 0  | 0  | 0  | 1 | 60          | [42]           |
| miR-4726-5p        | 0 | 1↓ | 0  | 0  | 0  | 1 | 30          | [94]           |
| miR-4735-3p        | 0 | 1↓ | 0  | 0  | 0  | 1 | 36          | [51]           |
| miR-4768-3p        | 0 | 0  | 0  | 1↓ | 0  | 1 | 48          | [121]          |
| miR-486-3p         | 0 | 2↓ | 0  | 0  | 0  | 2 | 40 (10-30)  | [37, 140]      |
| miR-486-5p         | 0 | 1↓ | 0  | 0  | 0  | 1 | 20          | [97]           |
| miR-493-3p         | 0 | 1↓ | 0  | 0  | 0  | 1 | 34          | [69]           |
| miR-497-5p         | 0 | 1↓ | 0  | 0  | 0  | 1 | 38          | [30]           |
| miR-506-3p         | 0 | 1↓ | 0  | 1↓ | 1↓ | 1 | 62          | [87]           |
| miR-518a-3p        | 0 | 1↓ | 0  | 0  | 0  | 1 | 60          | [47]           |
| miR-519a-3p        | 0 | 1↓ | 1↓ | 1↓ | 1↓ | 1 | 96          | [135]          |
| miR-524-5p         | 0 | 1↓ | 0  | 1↓ | 0  | 1 | 20          | [48]           |
| miR-539-5p         | 0 | 1↓ | 0  | 0  | 0  | 1 | 76          | [28]           |
| miR-613            | 0 | 1↓ | 0  | 0  | 0  | 1 | 30          | [109]          |
| miR-625-5p         | 0 | 1↓ | 0  | 1↓ | 1↓ | 1 | 86          | [88]           |
| miR-627-5p         | 0 | 1↓ | 0  | 0  | 1↓ | 1 | 76          | [28]           |
| miR-652-3p         | 0 | 1↓ | 0  | 0  | 1↓ | 1 | 76          | [28]           |
| miR-654-3p         | 0 | 1↓ | 0  | 0  | 0  | 1 | 44          | [55]           |
| miR-655-3p         | 0 | 1↓ | 0  | 0  | 0  | 1 | 105         | [23]           |
| miR-663a           | 0 | 1↓ | 0  | 0  | 0  | 1 | 10          | [129]          |
| miR-6786-5p        | 0 | 1↓ | 0  | 0  | 0  | 1 | 10          | [129]          |
| miR-744-5p         | 0 | 1↓ | 0  | 0  | 0  | 1 | 65          | [194]          |
| miR-7-5p           | 0 | 1↓ | 0  | 0  | 0  | 1 | 30          | [95]           |
| miR-766-5p         | 0 | 1↓ | 0  | 1↓ | 0  | 1 | 60          | [40]           |
| miR-873-5p         | 0 | 1↓ | 0  | 0  | 0  | 1 | 28          | [35]           |
| miR-885-5p         | 0 | 3↓ | 0  | 0  | 0  | 3 | 133 (10-76) | [28, 140, 168] |
| miR-936            | 0 | 1↓ | 1↓ | 1↓ | 1↓ | 1 | 25          | [62]           |
| <b>Upregulated</b> |   |    |    |    |    |   |             |                |
| let-7b-5p          | 0 | 1↑ | 0  | 0  | 0  | 1 | 10          | [129]          |
| miR-1246           | 0 | 2↑ | 0  | 0  | 0  | 2 | 73 (12-61)  | [32, 61]       |
| miR-1260b          | 0 | 0  | 1↑ | 0  | 0  | 1 | 60          | [42]           |

|             |    |     |    |    |    |    |               |                                                                    |
|-------------|----|-----|----|----|----|----|---------------|--------------------------------------------------------------------|
| miR-129-5p  | 0  | 1↑  | 0  | 1↑ | 1↑ | 1  | 36            | [138]                                                              |
| miR-1297    | 0  | 1↑  | 0  | 0  | 0  | 1  | 10            | [129]                                                              |
| miR-130b-3p | 0  | 1↑  | 0  | 0  | 0  | 1  | 60            | [42]                                                               |
| miR-130b-5p | 0  | 1↑  | 0  | 0  | 0  | 1  | 84            | [131]                                                              |
| miR-132-3p  | 0  | 2↑  | 0  | 0  | 0  | 2  | 86 (10-76)    | [28, 183]                                                          |
| miR-142-3p  | 0  | 2↑  | 0  | 0  | 0  | 2  | 122 (46-76)   | [28, 159]                                                          |
| miR-146a-5p | 0  | 1↑  | 0  | 0  | 0  | 1  | 33            | [196]                                                              |
| miR-147b-3p | 0  | 1↑  | 0  | 0  | 0  | 1  | 76            | [28]                                                               |
| miR-155-5p  | 1↑ | 7↑  | 4↑ | 4↑ | 2↑ | 7  | 1246 (20-840) | [26, 28, 59, 84, 106, 128, 169]                                    |
| miR-17-5p   | 0  | 1↑  | 0  | 1↑ | 0  | 1  | 39            | [66]                                                               |
| miR-181b 5p | 0  | 2↑  | 0  | 0  | 0  | 2  | 72 (12-60)    | [32, 42]                                                           |
| miR-182-5p  | 0  | 1↑  | 0  | 0  | 0  | 1  | 76            | [28]                                                               |
| miR-183-5p  | 1↑ | 1↑  | 0  | 0  | 0  | 1  | 20            | [26]                                                               |
| miR-184     | 0  | 1↑  | 0  | 0  | 0  | 1  | 76            | [28]                                                               |
| miR-185-5p  | 0  | 1↑  | 0  | 0  | 0  | 1  | 76            | [28]                                                               |
| miR-196a-5p | 0  | 3↑  | 0  | 0  | 0  | 3  | 207 (41-84)   | [59, 131, 177]                                                     |
| miR-196b-3p | 0  | 1↑  | 1↑ | 1↑ | 1↑ | 1  | 79            | [91]                                                               |
| miR-196b-5p | 0  | 3↑  | 1↑ | 1↑ | 0  | 3  | 230 (41-113)  | [28, 103, 177]                                                     |
| miR-198     | 0  | 1↑  | 0  | 0  | 0  | 1  | 76            | [28]                                                               |
| miR-19a-3p  | 0  | 3↑  | 2↑ | 2↑ | 1↑ | 3  | 166 (10-83)   | [140, 142, 165]                                                    |
| miR-202-3p  | 0  | 0   | 0  | 1↑ | 0  | 1  | 48            | [121]                                                              |
| miR-20a-5p  | 0  | 1↑  | 0  | 0  | 0  | 1  | 10            | [129]                                                              |
| miR-20b-5p  | 0  | 2↑  | 0  | 0  | 0  | 2  | 181 (76-105)  | [28, 31]                                                           |
| miR-210-3p  | 0  | 4↑  | 0  | 0  | 0  | 4  | 174 (12-82)   | [26, 32, 42, 59]                                                   |
| miR-21-3p   | 0  | 5↑  | 1↑ | 0  | 0  | 6  | 252 (12-82)   | [32, 42, 59, 97, 146, 168]                                         |
| miR-214-3p  | 0  | 1↑  | 0  | 0  | 0  | 1  | 10            | [129]                                                              |
| miR-21-5p   | 1↑ | 14↑ | 3↑ | 3↑ | 3↑ | 14 | 680 (10-116)  | [26, 28, 59, 67, 110, 123, 129, 130, 140, 145, 147, 159, 174, 176] |
| miR-218-3p  | 0  | 1↑  | 0  | 0  | 0  | 1  | 20            | [26]                                                               |
| miR-221-3p  | 0  | 2↑  | 0  | 1↑ | 2↑ | 2  | 132 (50-82)   | [59, 120]                                                          |
| miR-222-3p  | 0  | 1↑  | 0  | 0  | 0  | 1  | 82            | [59]                                                               |
| miR-223-3p  | 0  | 1↑  | 0  | 0  | 0  | 1  | 46            | [159]                                                              |
| miR-23a-3p  | 0  | 2↑  | 0  | 1↑ | 1↑ | 2  | 134 (52-82)   | [155, 160]                                                         |
| miR-23b-3p  | 0  | 1↑  | 0  | 0  | 0  | 1  | 10            | [129]                                                              |



|             |    |       |    |       |       |   |                               |                                            |
|-------------|----|-------|----|-------|-------|---|-------------------------------|--------------------------------------------|
| miR-106b-3p | 1↑ | 5↑ 1↓ | 0  | 1↑    | 2↑    | 6 | 145↑ (14-59)<br>48↓           | [26, 127, 132, 145, 146,<br>196]           |
| miR-1290    | 0  | 1↑ 1↓ | 0  | 0     | 1↓    | 2 | 50↑ 48↓                       | [161, 196]                                 |
| miR-138-5p  | 0  | 1↑ 1↓ | 0  | 1↓    | 0     | 2 | 76↑ 30↓                       | [28, 166]                                  |
| miR-139-3p  | 0  | 1↑ 2↓ | 0  | 0     | 1↓    | 3 | 48↑<br>72↓ (25-47)            | [36, 168, 196]                             |
| miR-148a-3p | 0  | 1↑ 1↓ | 0  | 0     | 1↓    | 2 | 179↑ 12↓                      | [182, 178]                                 |
| miR-181a-5p | 0  | 1↑ 2↓ | 0  | 0     | 0     | 3 | 76↑ 45↓                       | [28, 45, 78]                               |
| miR-18a-5p  | 0  | 1↑ 1↓ | 0  | 0     | 0     | 2 | 12↑ 10↓                       | [32, 129]                                  |
| miR-205-5p  | 0  | 3↑ 2↓ |    | 1↓    | 0     | 5 | 98↑ (10-48)<br>40↓ (10-30)    | [129, 130, 136, 164,<br>188]               |
| miR-24-3p   | 0  | 1↑ 2↓ | 0  | 0     | 0     | 3 | 10↑<br>35↓ (15-20)            | [125, 129, 152]                            |
| miR-26a-5p  | 0  | 1↑ 2↓ | 0  | 0     | 0     | 3 | 56↑<br>38↓ (10-28)            | [53, 108, 129]                             |
| miR-29a-3p  | 0  | 1↓    | 0  | 1↑    | 0     | 2 | 48↑ 28↓                       | [119, 121]                                 |
| miR-300     | 0  | 1↑ 1↓ | 0  | 0     | 0     | 2 | 133↑ 30↓                      | [185, 190]                                 |
| miR-31-5p   | 0  | 2↑ 1↓ | 1↑ | 1↑ 1↓ | 0     | 3 | 142↑ (60-82)<br>40↓           | [42, 59, 104]                              |
| miR-34a-5p  | 0  | 1↑ 3↓ | 2↓ | 2↓    | 2↓    | 4 | 33↑<br>150↓ (10-71)           | [50, 124, 129, 172]                        |
| miR-375-3p  | 0  | 2↑ 7↓ | 3↓ | 1↑ 6↓ | 1↑ 1↓ | 9 | 227↑ (48-179)<br>316↓ (10-76) | [28, 140, 145, 149, 159,<br>178, 188, 196] |

\*Numbers correspond to the number of studies reporting the association with the diagnostic parameter. ↑ : upregulated miRNA. ↓: downregulated miRNA. #Cohort numerosity indicates the number of patients, and when two or more papers reported the same miRNA, the minimum and the maximum number of patients is indicated inside brackets.
